# Supplementary material for: Erlotinib in Lung Cancer — Molecular and Clinical Predictors of Outcome
Source: Atypon-hosted journal article supplement (doi:10.1056/nejmoa050736), 2005-07-13

## Supplementary Appendix

This appendix has been provided by the authors to give readers additional information about their work.

Supplement to: Tsao M-S, Sakurada A, Cutz J-C, et al. Erlotinib in lung cancer — molecular and clinical predictors of outcome. *N Engl J Med* 2005;353:133-44.

Supplemental information for on-line publication only

Supplemental Table 1. Summary of Sample Collection and Laboratory Testing by Treatment Arm

|                                                                     | <b>Erlotinib</b> | <b>Control</b> | <b>Total</b> |
|---------------------------------------------------------------------|------------------|----------------|--------------|
| <b>Number of patients in trial</b>                                  | 488              | 243            | 731 (100%)   |
| <b>Number of patients who consented to EGFR testing</b>             | 313              | 159            | 472 (65%)    |
| <b>Number of patients with usable slides for IHC</b>                | 242              | 133            | 325 (44%)    |
| <b>Number of patients with usable tissue for sequencing or FISH</b> | 148              | 78             | 226 (31%)    |
| <b>Number of patients with successful IHC analysis</b>              | 210              | 115            | 325 (44%)    |
| <b>Number of patients with successful FISH analysis</b>             | 77               | 48             | 125 (17%)    |
| <b>Number of patients with successful molecular sequencing</b>      | 114              | 63             | 177 (24%)    |

IHC: immunohistochemistry; FISH: fluorescence in-situ hybridization

## Supplemental Table 2

### A Detailed Summary of Mutations Found in 40 Tumors, Correlated with the Results of FISH Analyses.

| Specimen Number | Exon (del/mut) | Mutation          | Nucleotide Change <sup>1</sup> | Mutation <sup>2</sup> | Nucleotide Change | Gene Copy Change |
|-----------------|----------------|-------------------|--------------------------------|-----------------------|-------------------|------------------|
| 6359            | 18mut          | * L688P           | 18(2063 T>C)                   |                       |                   | High Trisomy     |
| 4979            | 18mut          | * P694L           | 18(2081 C>T)                   |                       |                   | Unknown          |
| 5326            | 18mut          | * P694S           | 18(2080 C>T)                   |                       |                   | Unknown          |
| 4992            | 19del          | delE746_A750      | 19(2235_2249del)               |                       |                   | Low Polysomy     |
| 5349            | 19del          | delE746_A750      | 19(2236_2250del)               |                       |                   | Low Polysomy     |
| 3588            | 19del          | delE746_A750      | 19(2235_2249del)               |                       |                   | Low Polysomy     |
| 3633            | 19del          | delE746_P753insLS | 19(2236_2257del + "CTCT" ins)  |                       |                   | Unknown          |
| 3733            | 19del          | delE746_S752insV  | 19(2237_2255del + "T" ins)     |                       |                   | Unknown          |
| 4625            | 19del          | delE746_S752insV  | 19(2237_2255del + "T" ins)     |                       |                   | Low Polysomy     |
| 5357            | 19del          | delE746_S752insV  | 19(2237_2255del + "T" ins)     |                       |                   | High Trisomy     |
| 5550            | 19del          | delE746_S752insV  | 19(2237_2501del + "T" ins)     |                       |                   | Unknown          |
| 4583            | 19del          | delL747_A750insP  | 19(2238_2248del + "GC"ins)     |                       |                   | Amplification    |
| 3236            | 19del          | delL747_T751insP  | 19(2239_2251del + "C" ins)     |                       |                   | High Trisomy     |
| 3696            | 19del; 19mut   | delE746_A750      | 19(2235_2249del)               | * L730F               | 19(2188 C>T)      | High Trisomy     |
| 4990            | 19del; 19mut   | delE746_S752insV  | 19(2237_2255del + "T" ins)     | * P733L               | 19(2198 C>T)      | Unknown          |
| 4577            | 19del; 21mut   | delE746_S752insV  | 19(2237_2255del + "T" ins)     | L858R                 | 21(2573 T>G)      | High Trisomy     |
| 5356            | 19mut          | * G735S           | 19(2203 G>A)                   |                       |                   | Unknown          |
| 4624            | 19mut          | * V742A           | 19(2225 T>C)                   |                       |                   | Low Polysomy     |
| 3615            | 19mut          | * E746K           | 19(2236 G>A)                   |                       |                   | Unknown          |
| 5330            | 19mut; 21mut   | * T751I           | 19(2252 C>T)                   | * H850N               | 21(2548 C>A)      | Diploid          |
| 3638            | 19mut          | * S752Y           | 19(2255 C>A)                   |                       |                   | High Trisomy     |

|             |              |         |              |       |              |               |
|-------------|--------------|---------|--------------|-------|--------------|---------------|
| <b>3695</b> | 19mut        | * D761N | 19(2281 G>A) |       |              | Unknown       |
| <b>3595</b> | 20mut; 21mut | * S784F | 10(2351 C>T) | L858R | 21(2573 T>G) | Diploid       |
| <b>5313</b> | 20mut        | * L792P | 20(2375 T>C) |       |              | Low Trisomy   |
| <b>6374</b> | 20mut        | * L792P | 20(2375 T>C) |       |              | Low Trisomy   |
| <b>5347</b> | 20mut        | * L798F | 20(2392 C>T) |       |              | High Trisomy  |
| <b>4515</b> | 20mut        | * G810S | 20(2428 G>A) |       |              | Low Trisomy   |
| <b>4988</b> | 21mut        | * N826S | 21(2477 A>G) |       |              | Unknown       |
| <b>3617</b> | 21mut        | * T847I | 21(2540 C>T) |       |              | Unknown       |
| <b>6367</b> | 21mut        | * V851A | 21(2552 T>C) |       |              | Unknown       |
| <b>3584</b> | 21mut        | * I853T | 21(2558 T>C) |       |              | Unknown       |
| <b>4140</b> | 21mut        | L858R   | 21(2573 T>G) |       |              | High Trisomy  |
| <b>4163</b> | 21mut        | L858R   | 21(2573 T>G) |       |              | Unknown       |
| <b>4991</b> | 21mut        | L858R   | 21(2573 T>G) |       |              | Low Trisomy   |
| <b>5315</b> | 21mut        | L858R   | 21(2573 T>G) |       |              | High Trisomy  |
| <b>5346</b> | 21mut        | L858R   | 21(2573 T>G) |       |              | Amplification |
| <b>6360</b> | 21mut        | L858R   | 21(2573 T>G) |       |              | Unknown       |
| <b>5325</b> | 21mut        | * A864T | 21(2590 G>A) |       |              | Unknown       |
| <b>4538</b> | 21mut        | * E866K | 21(2596G>A)  |       |              | Diploid       |
| <b>3791</b> | 21mut        | * G873E | 21(2618 G>A) |       |              | Unknown       |

<sup>1</sup> The sequences are referenced against NM\_005228, with the first nucleotide (247) of the translation initiation codon as origin.

<sup>2</sup> Unknown gene copy number is caused by failure of FISH studies.

\* Novel mutation.

**Supplemental Figure:** A comparison of survival for patients with (A) exon 19 deletions and exon 21 L858R mutations, and (B) novel mutations treated with erlotinib and placebo.

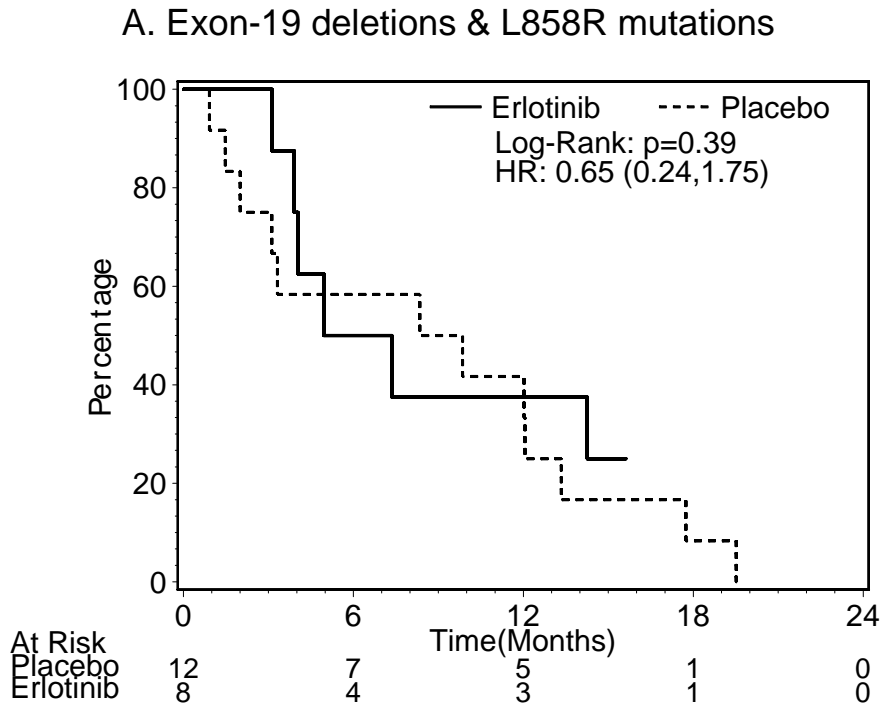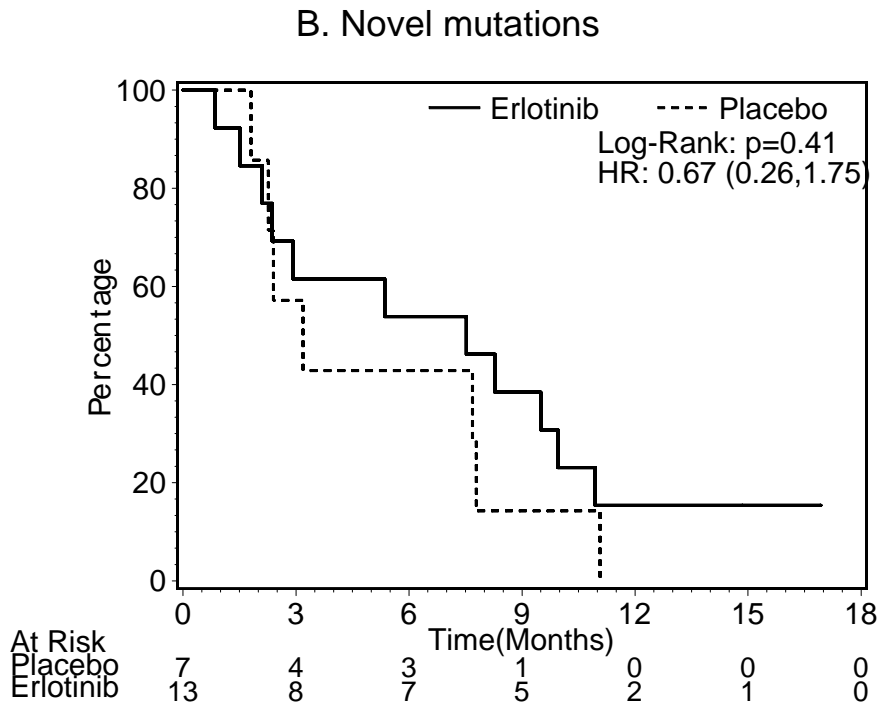

Supplement: nejm_tsao_sa_133.pdf [file nejm_tsao_sa_133.pdf]
